# Supplementary material
Source: Springer Nature journal article supplement (https://www.springermedizin.de/resource/supplementary/12885_2014_4959_MOESM10_ESM.pdf/9467818)

## SLC13A5

A

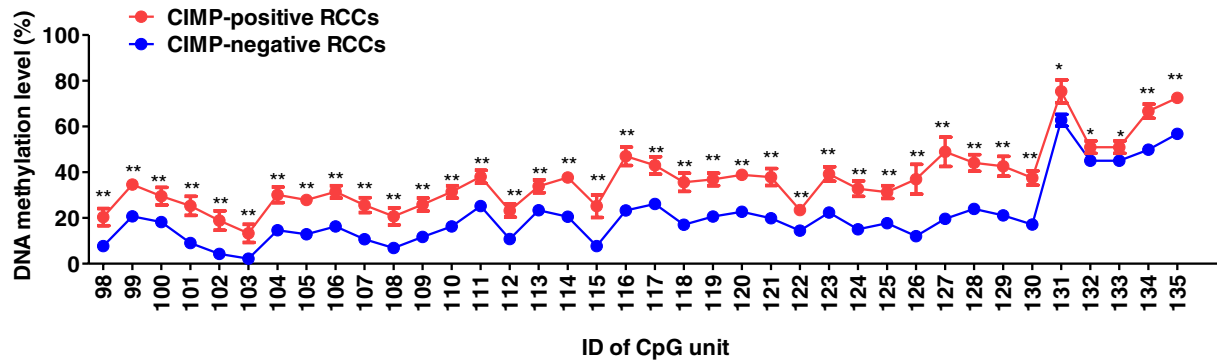

B

## ZNF671

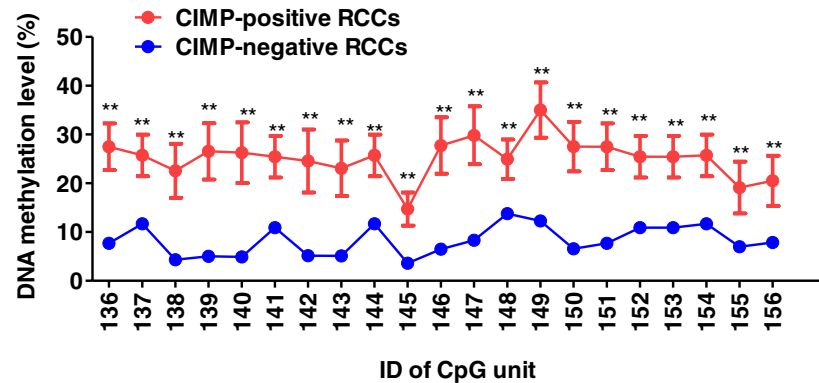\*\*  $P < 0.01$ \*  $P < 0.05$

Supplement: MOESM10 [file 9467818]
